# Supplementary material for: Shape Optimization for Additive Manufacturing of Removable Partial Dentures - A New Paradigm for Prosthetic CAD/CAM
Source: PubMed Central journal article supplement (PMC4498620; doi:10.1371/journal.pone.0132552), 2015-07-10
Supplement: pone.0132552.s001.pdf [file pone.0132552.s001.pdf]

**S1 Table: Optimisaiton Convergence History through 100 Iterations, including Total Vertical Force (TotalNFz), Contact Area (Carea), Maximum Contact Pressure (CPreMax), Contact Pressure Standard Deviation (CPreStv), Contact Pressure Standard Deviation Change Rate (CPreStv Change Rate), Average Contact Pressure (CPreAve), Maximum Vertical Force (MaxNFz), Average Vertical Force (AverNFz), and Number of Nodes in Contact (#Node in Contact).**

| Iter | TotalNFz | CArea  | CPreMax | CPreStv | CPreStv Change Rate | CPreAve | MaxNFz | AverNFz | #Node in Contact |
|------|----------|--------|---------|---------|---------------------|---------|--------|---------|------------------|
| 0    | 88.00    | 276.99 | 0.2092  | 0.0510  |                     | 0.0444  | 0.1551 | 0.0318  | 295              |
| 1    | 84.70    | 277.55 | 0.1935  | 0.0487  | -4.49%              | 0.0422  | 0.1556 | 0.0305  | 297              |
| 2    | 81.82    | 278.05 | 0.1433  | 0.0450  | -7.27%              | 0.0405  | 0.1063 | 0.0294  | 297              |
| 3    | 79.28    | 280.45 | 0.1224  | 0.0344  | -20.78%             | 0.0393  | 0.0986 | 0.0283  | 298              |
| 4    | 79.38    | 281.26 | 0.1164  | 0.0321  | -4.62%              | 0.0391  | 0.0824 | 0.0282  | 298              |
| 5    | 78.09    | 280.51 | 0.1117  | 0.0314  | -1.24%              | 0.0383  | 0.0843 | 0.0278  | 298              |
| 6    | 76.90    | 282.44 | 0.1102  | 0.0302  | -2.49%              | 0.0375  | 0.0815 | 0.0272  | 298              |
| 7    | 76.85    | 283.17 | 0.0999  | 0.0287  | -2.86%              | 0.0375  | 0.0992 | 0.0271  | 301              |
| 8    | 76.42    | 283.20 | 0.1032  | 0.0274  | -2.47%              | 0.0370  | 0.0805 | 0.0270  | 301              |
| 9    | 75.48    | 283.16 | 0.0992  | 0.0276  | 0.34%               | 0.0365  | 0.0697 | 0.0267  | 301              |
| 10   | 75.34    | 282.33 | 0.1067  | 0.0285  | 1.76%               | 0.0365  | 0.0932 | 0.0267  | 301              |
| 11   | 74.87    | 283.02 | 0.0964  | 0.0257  | -5.50%              | 0.0361  | 0.0911 | 0.0265  | 301              |
| 12   | 75.03    | 282.28 | 0.1023  | 0.0255  | -0.46%              | 0.0361  | 0.0854 | 0.0266  | 301              |
| 13   | 74.44    | 282.03 | 0.0946  | 0.0249  | -1.12%              | 0.0359  | 0.0815 | 0.0264  | 301              |
| 14   | 74.35    | 282.90 | 0.0951  | 0.0259  | 1.96%               | 0.0356  | 0.0789 | 0.0263  | 301              |
| 15   | 73.33    | 283.81 | 0.0911  | 0.0248  | -2.21%              | 0.0351  | 0.0689 | 0.0258  | 301              |
| 16   | 73.39    | 283.95 | 0.0883  | 0.0233  | -2.93%              | 0.0350  | 0.0762 | 0.0258  | 301              |
| 17   | 73.84    | 283.02 | 0.0953  | 0.0248  | 3.02%               | 0.0354  | 0.0750 | 0.0261  | 301              |
| 18   | 73.86    | 283.72 | 0.0896  | 0.0243  | -0.98%              | 0.0351  | 0.0854 | 0.0260  | 301              |
| 19   | 73.16    | 283.79 | 0.0934  | 0.0239  | -0.84%              | 0.0348  | 0.0973 | 0.0258  | 301              |
| 20   | 72.90    | 283.88 | 0.0913  | 0.0245  | 1.13%               | 0.0346  | 0.0789 | 0.0257  | 301              |
| 21   | 73.26    | 283.77 | 0.0947  | 0.0226  | -3.77%              | 0.0347  | 0.0735 | 0.0258  | 301              |
| 22   | 73.43    | 283.59 | 0.0920  | 0.0248  | 4.42%               | 0.0349  | 0.0834 | 0.0259  | 301              |
| 23   | 72.99    | 282.72 | 0.0951  | 0.0239  | -1.82%              | 0.0346  | 0.0878 | 0.0258  | 301              |

|    |       |        |        |        |         |        |        |        |     |
|----|-------|--------|--------|--------|---------|--------|--------|--------|-----|
| 24 | 73.34 | 282.02 | 0.0857 | 0.0265 | 5.21%   | 0.0347 | 0.0814 | 0.0260 | 302 |
| 25 | 72.45 | 281.42 | 0.0894 | 0.0248 | -3.37%  | 0.0343 | 0.0710 | 0.0257 | 302 |
| 26 | 72.58 | 282.74 | 0.0848 | 0.0217 | -6.08%  | 0.0343 | 0.0805 | 0.0257 | 302 |
| 27 | 72.72 | 282.68 | 0.0854 | 0.0267 | 9.74%   | 0.0343 | 0.0631 | 0.0257 | 302 |
| 28 | 72.28 | 282.59 | 0.0864 | 0.0217 | -9.72%  | 0.0342 | 0.0786 | 0.0256 | 302 |
| 29 | 72.51 | 281.90 | 0.0905 | 0.0261 | 8.60%   | 0.0341 | 0.0739 | 0.0257 | 302 |
| 30 | 73.02 | 281.76 | 0.0830 | 0.0276 | 2.83%   | 0.0345 | 0.0699 | 0.0259 | 302 |
| 31 | 72.48 | 282.28 | 0.0897 | 0.0215 | -11.90% | 0.0341 | 0.0732 | 0.0257 | 302 |
| 32 | 72.13 | 283.72 | 0.0821 | 0.0266 | 10.02%  | 0.0338 | 0.0638 | 0.0254 | 302 |
| 33 | 71.79 | 283.70 | 0.0806 | 0.0236 | -5.96%  | 0.0337 | 0.0695 | 0.0253 | 302 |
| 34 | 72.11 | 283.62 | 0.0802 | 0.0224 | -2.19%  | 0.0338 | 0.0689 | 0.0254 | 302 |
| 35 | 72.30 | 283.11 | 0.0803 | 0.0243 | 3.61%   | 0.0338 | 0.0731 | 0.0255 | 302 |
| 36 | 72.22 | 282.85 | 0.0850 | 0.0266 | 4.63%   | 0.0338 | 0.0719 | 0.0255 | 302 |
| 37 | 72.39 | 283.41 | 0.0819 | 0.0211 | -10.95% | 0.0338 | 0.0692 | 0.0255 | 302 |
| 38 | 71.57 | 284.76 | 0.0792 | 0.0248 | 7.28%   | 0.0332 | 0.0729 | 0.0251 | 302 |
| 39 | 72.16 | 285.00 | 0.0789 | 0.0221 | -5.29%  | 0.0336 | 0.0633 | 0.0253 | 302 |
| 40 | 71.42 | 284.57 | 0.0813 | 0.0248 | 5.41%   | 0.0332 | 0.0689 | 0.0251 | 302 |
| 41 | 71.14 | 284.57 | 0.0779 | 0.0226 | -4.44%  | 0.0330 | 0.0688 | 0.0250 | 302 |
| 42 | 72.03 | 283.76 | 0.0802 | 0.0241 | 2.95%   | 0.0334 | 0.0709 | 0.0254 | 302 |
| 43 | 71.50 | 284.58 | 0.0736 | 0.0231 | -1.84%  | 0.0333 | 0.0631 | 0.0251 | 302 |
| 44 | 71.89 | 284.13 | 0.0729 | 0.0264 | 6.42%   | 0.0332 | 0.0533 | 0.0253 | 302 |
| 45 | 72.18 | 285.18 | 0.0781 | 0.0210 | -10.52% | 0.0334 | 0.0661 | 0.0253 | 302 |
| 46 | 71.09 | 285.40 | 0.0755 | 0.0254 | 8.48%   | 0.0329 | 0.0672 | 0.0249 | 302 |
| 47 | 71.07 | 286.19 | 0.0829 | 0.0220 | -6.63%  | 0.0327 | 0.0603 | 0.0248 | 302 |
| 48 | 71.41 | 285.44 | 0.0794 | 0.0253 | 6.44%   | 0.0329 | 0.0710 | 0.0250 | 302 |
| 49 | 71.19 | 286.53 | 0.0757 | 0.0218 | -6.86%  | 0.0327 | 0.0671 | 0.0248 | 302 |
| 50 | 71.81 | 287.09 | 0.0781 | 0.0257 | 7.66%   | 0.0330 | 0.0704 | 0.0250 | 302 |
| 51 | 71.29 | 285.65 | 0.0719 | 0.0241 | -3.00%  | 0.0327 | 0.0637 | 0.0250 | 302 |
| 52 | 71.39 | 286.43 | 0.0763 | 0.0209 | -6.34%  | 0.0327 | 0.0640 | 0.0249 | 302 |
| 53 | 70.49 | 287.05 | 0.0805 | 0.0227 | 3.52%   | 0.0324 | 0.0596 | 0.0246 | 302 |
| 54 | 71.22 | 286.69 | 0.0775 | 0.0231 | 0.76%   | 0.0327 | 0.0684 | 0.0248 | 302 |
| 55 | 71.15 | 287.91 | 0.0766 | 0.0198 | -6.51%  | 0.0325 | 0.0573 | 0.0247 | 302 |
| 56 | 71.01 | 287.53 | 0.0765 | 0.0207 | 1.90%   | 0.0325 | 0.0746 | 0.0247 | 302 |

|    |       |        |        |        |         |        |        |        |     |
|----|-------|--------|--------|--------|---------|--------|--------|--------|-----|
| 57 | 70.62 | 286.06 | 0.0727 | 0.0210 | 0.52%   | 0.0324 | 0.0582 | 0.0247 | 302 |
| 58 | 71.34 | 287.92 | 0.0754 | 0.0214 | 0.72%   | 0.0327 | 0.0649 | 0.0248 | 302 |
| 59 | 70.78 | 286.93 | 0.0677 | 0.0193 | -4.14%  | 0.0324 | 0.0589 | 0.0247 | 302 |
| 60 | 71.00 | 287.33 | 0.0719 | 0.0233 | 7.91%   | 0.0325 | 0.0717 | 0.0247 | 302 |
| 61 | 70.48 | 288.47 | 0.0759 | 0.0233 | -0.03%  | 0.0322 | 0.0594 | 0.0244 | 302 |
| 62 | 70.41 | 287.13 | 0.0727 | 0.0204 | -5.58%  | 0.0322 | 0.0700 | 0.0245 | 302 |
| 63 | 70.70 | 287.37 | 0.0743 | 0.0255 | 10.03%  | 0.0323 | 0.0578 | 0.0246 | 302 |
| 64 | 70.77 | 287.27 | 0.0790 | 0.0192 | -12.37% | 0.0323 | 0.0625 | 0.0246 | 302 |
| 65 | 70.92 | 287.35 | 0.0757 | 0.0250 | 11.30%  | 0.0324 | 0.0614 | 0.0247 | 302 |
| 66 | 71.32 | 287.49 | 0.0748 | 0.0222 | -5.42%  | 0.0326 | 0.0573 | 0.0248 | 302 |
| 67 | 70.71 | 287.39 | 0.0782 | 0.0211 | -2.32%  | 0.0324 | 0.0725 | 0.0246 | 302 |
| 68 | 70.76 | 287.28 | 0.0717 | 0.0218 | 1.47%   | 0.0323 | 0.0611 | 0.0246 | 302 |
| 69 | 70.81 | 287.35 | 0.0709 | 0.0190 | -5.50%  | 0.0324 | 0.0593 | 0.0246 | 302 |
| 70 | 70.56 | 288.01 | 0.0726 | 0.0230 | 7.94%   | 0.0320 | 0.0614 | 0.0245 | 302 |
| 71 | 70.60 | 286.87 | 0.0680 | 0.0208 | -4.48%  | 0.0324 | 0.0743 | 0.0246 | 302 |
| 72 | 70.32 | 287.69 | 0.0717 | 0.0204 | -0.75%  | 0.0319 | 0.0656 | 0.0244 | 302 |
| 73 | 70.58 | 287.26 | 0.0716 | 0.0238 | 6.77%   | 0.0320 | 0.0622 | 0.0246 | 302 |
| 74 | 70.80 | 287.98 | 0.0741 | 0.0211 | -5.37%  | 0.0323 | 0.0695 | 0.0246 | 302 |
| 75 | 71.07 | 287.85 | 0.0751 | 0.0221 | 1.99%   | 0.0323 | 0.0656 | 0.0247 | 303 |
| 76 | 70.55 | 288.44 | 0.0731 | 0.0205 | -3.07%  | 0.0320 | 0.0686 | 0.0245 | 303 |
| 77 | 70.64 | 288.43 | 0.0712 | 0.0208 | 0.60%   | 0.0322 | 0.0654 | 0.0245 | 303 |
| 78 | 70.55 | 287.99 | 0.0738 | 0.0230 | 4.14%   | 0.0319 | 0.0739 | 0.0245 | 303 |
| 79 | 70.16 | 288.35 | 0.0723 | 0.0185 | -8.69%  | 0.0319 | 0.0600 | 0.0243 | 304 |
| 80 | 70.86 | 287.72 | 0.0724 | 0.0210 | 4.81%   | 0.0321 | 0.0757 | 0.0246 | 304 |
| 81 | 70.77 | 288.25 | 0.0716 | 0.0231 | 4.18%   | 0.0321 | 0.0651 | 0.0246 | 304 |
| 82 | 70.74 | 287.90 | 0.0710 | 0.0200 | -6.08%  | 0.0320 | 0.0761 | 0.0246 | 305 |
| 83 | 70.54 | 288.55 | 0.0704 | 0.0213 | 2.59%   | 0.0320 | 0.0661 | 0.0244 | 305 |
| 84 | 70.14 | 288.76 | 0.0714 | 0.0230 | 3.18%   | 0.0317 | 0.0643 | 0.0243 | 305 |
| 85 | 70.18 | 287.91 | 0.0742 | 0.0195 | -6.83%  | 0.0318 | 0.0752 | 0.0244 | 305 |
| 86 | 69.66 | 288.43 | 0.0701 | 0.0187 | -1.58%  | 0.0315 | 0.0543 | 0.0242 | 305 |
| 87 | 69.99 | 288.29 | 0.0739 | 0.0197 | 1.97%   | 0.0318 | 0.0678 | 0.0243 | 305 |
| 88 | 70.28 | 287.99 | 0.0706 | 0.0183 | -2.62%  | 0.0317 | 0.0561 | 0.0244 | 305 |
| 89 | 70.25 | 287.26 | 0.0718 | 0.0215 | 6.23%   | 0.0319 | 0.0628 | 0.0245 | 305 |

|     |       |        |        |        |        |        |        |        |     |
|-----|-------|--------|--------|--------|--------|--------|--------|--------|-----|
| 90  | 70.17 | 287.96 | 0.0708 | 0.0190 | -4.94% | 0.0317 | 0.0587 | 0.0244 | 305 |
| 91  | 69.96 | 288.19 | 0.0721 | 0.0204 | 2.68%  | 0.0317 | 0.0762 | 0.0243 | 305 |
| 92  | 69.77 | 287.51 | 0.0695 | 0.0186 | -3.40% | 0.0315 | 0.0703 | 0.0243 | 305 |
| 93  | 70.40 | 287.51 | 0.0712 | 0.0194 | 1.48%  | 0.0318 | 0.0545 | 0.0245 | 305 |
| 94  | 69.60 | 287.46 | 0.0672 | 0.0189 | -0.99% | 0.0315 | 0.0690 | 0.0242 | 305 |
| 95  | 69.83 | 288.34 | 0.0687 | 0.0191 | 0.52%  | 0.0315 | 0.0659 | 0.0242 | 305 |
| 96  | 70.20 | 288.45 | 0.0673 | 0.0189 | -0.57% | 0.0317 | 0.0679 | 0.0243 | 305 |
| 97  | 70.37 | 286.63 | 0.0651 | 0.0192 | 0.64%  | 0.0319 | 0.0642 | 0.0246 | 305 |
| 98  | 70.71 | 287.11 | 0.0667 | 0.0187 | -0.94% | 0.0321 | 0.0780 | 0.0246 | 305 |
| 99  | 70.65 | 287.06 | 0.0665 | 0.0188 | 0.28%  | 0.0320 | 0.0597 | 0.0246 | 305 |
| 100 | 69.42 | 286.19 | 0.0656 | 0.0185 | -0.67% | 0.0315 | 0.0768 | 0.0243 | 305 |
