# Supplementary material for: Shape Optimization for Additive Manufacturing of Removable Partial Dentures - A New Paradigm for Prosthetic CAD/CAM
Source: PubMed Central journal article supplement (PMC4498620; doi:10.1371/journal.pone.0132552), 2015-07-10
Supplement: pone.0132552.s002.pdf [file pone.0132552.s002.pdf]

**S2 Table: Summary of Literature Pressure-Pain Threshold Data and Comparison of FEA Results before and after Optimization**

| Name          | Age   | Number | Load | Load SD | Loading Cell Diameter | Pressure | Pressure SD | Note      |
|---------------|-------|--------|------|---------|-----------------------|----------|-------------|-----------|
| Ogimoto       | 26.5  | 10     | 260  | 100.9   | 2.0                   | 405.53   | 157.38      |           |
| Suzuki        | 75    | 8      | 358  | 35.8    | 6.0                   | 124.08   | 12.41       | 7days     |
|               | 75    | 8      | 662  | 66      | 6.0                   | 229.45   | 22.88       | 30days    |
|               | 75    | 8      | 978  | 97      | 6.0                   | 338.98   | 33.62       | 90days    |
| Ogawa         | 27.2  | 10     | 380  | 50      | 1.5                   | 1053.68  | 138.64      |           |
| Tanaka        | 74.9  | 20     | 180  | 50      | 2.0                   | 280.75   | 77.99       |           |
| Ogawa         | 25.2  | 20     | 200  | 50      | 2.0                   | 311.94   | 77.99       | 1st Molar |
|               | 25.2  | 20     | 220  | 40      | 2.0                   | 343.14   | 62.39       | 2nd Molar |
| McMillan      | 20-30 | 10     | 264  | 79      | 4.0                   | 102.94   | 30.80       | 1st Molar |
|               | 20-30 | 10     | 271  | 86      | 4.0                   | 105.67   | 33.53       | 2nd Molar |
| Daveport      | 20.7  | 10     | 212  | 50      | 3.0                   | 146.96   | 34.66       |           |
| Ori-FEA       |       |        |      |         |                       | 209.19   |             |           |
| Optimized-FEA |       |        |      |         |                       | 65.11    |             |           |
