# Supplementary material for: Shape Optimization for Additive Manufacturing of Removable Partial Dentures - A New Paradigm for Prosthetic CAD/CAM
Source: PubMed Central journal article supplement (PMC4498620; doi:10.1371/journal.pone.0132552), 2015-07-10
Supplement: pone.0132552.s003.pdf [file pone.0132552.s003.pdf]

**S3 Table: Change of Hydrostatic Pressure in the Oral Mucosa through Optimization**

| <b>Iter</b> | <b>Hydro (kPa)</b> |
|-------------|--------------------|
| 0           | 29.45              |
| 1           | 27.91              |
| 2           | 27.24              |
| 3           | 26.50              |
| 4           | 26.34              |
| 5           | 25.95              |
| 6           | 25.46              |
| 7           | 25.19              |
| 8           | 25.11              |
| 9           | 24.85              |
| 10          | 25.04              |
| 11          | 24.00              |
| 12          | 24.60              |
| 13          | 24.06              |
| 14          | 24.76              |
| 15          | 23.95              |
| 16          | 23.57              |
| 17          | 23.86              |
| 18          | 23.59              |
| 19          | 23.85              |
| 20          | 23.04              |
| 21          | 22.91              |
| 22          | 23.56              |
| 23          | 22.71              |
| 24          | 24.75              |
| 25          | 23.26              |
| 26          | 23.37              |
| 27          | 22.75              |
| 28          | 22.80              |
| 29          | 24.08              |
| 30          | 22.68              |
| 31          | 23.01              |
| 32          | 22.50              |
| 33          | 22.51              |
| 34          | 22.58              |
| 35          | 23.26              |
| 36          | 22.94              |
| 37          | 22.71              |
| 38          | 22.01              |
| 39          | 22.20              |
| 40          | 23.19              |
| 41          | 22.17              |
| 42          | 22.54              |
| 43          | 22.26              |
| 44          | 22.71              |
| 45          | 22.50              |
| 46          | 22.67              |

|    |       |
|----|-------|
| 47 | 21.75 |
| 48 | 22.39 |
| 49 | 22.26 |
| 50 | 21.80 |
| 51 | 21.74 |
| 52 | 22.52 |
| 53 | 21.63 |
| 54 | 22.08 |
| 55 | 21.70 |
| 56 | 23.26 |
| 57 | 21.75 |
| 58 | 21.71 |
| 59 | 21.67 |
| 60 | 22.03 |
| 61 | 22.60 |
| 62 | 21.52 |
| 63 | 21.71 |
| 64 | 21.58 |
| 65 | 21.91 |
| 66 | 21.63 |
| 67 | 21.57 |
| 68 | 21.38 |
| 69 | 21.18 |
| 70 | 21.48 |
| 71 | 21.72 |
| 72 | 22.35 |
| 73 | 20.95 |
| 74 | 21.63 |
| 75 | 20.73 |
| 76 | 21.58 |
| 77 | 21.24 |
| 78 | 21.74 |
| 79 | 21.04 |
| 80 | 21.74 |
| 81 | 21.16 |
| 82 | 21.17 |
| 83 | 20.98 |
| 84 | 21.60 |
| 85 | 21.21 |
| 86 | 21.47 |
| 87 | 20.84 |
| 88 | 20.68 |
| 89 | 19.97 |
| 90 | 20.59 |
| 91 | 20.51 |
| 92 | 20.46 |
| 93 | 20.32 |
| 94 | 20.20 |
| 95 | 20.26 |
| 96 | 20.76 |

97  
98  
99  
100

20.08  
20.32  
19.98  
19.66
